# Supplementary material
Source: PubMed Central journal article supplement (PMC6902189)
Supplement: jamapediatr-174-71-s001.pdf [file jamapediatr-174-71-s001.pdf]

## Supplementary Online Content

Trinh M-H, Sundaram R, Robinson SL, et al. Association of trajectory and covariates of children's screen media time. *JAMA Pediatr*. Published online November 25, 2019. doi:10.1001/jamapediatrics.2019.4488

**eTable 1.** Baseline Characteristics Between Included and Excluded Participants (n = 5034)

**eTable 2.** Mean and Median Screen Time by Age, for Each Trajectory Cluster (n = 1045)

**eTable 3.** Parental, Child, and Household Characteristics of Sample by Screen Time Trajectory (n = 1045)

**eFigure.** Mean Screen Time by Age Among Complete Data (n = 398)

This supplementary material has been provided by the authors to give readers additional information about their work.

**eTable 1. Baseline Characteristics Between Included and Excluded Participants (n = 5034)<sup>a</sup>**

| Sociodemographic characteristics     | Included |        | Excluded |        | P-value <sup>b</sup> |
|--------------------------------------|----------|--------|----------|--------|----------------------|
|                                      | N        | %      | N        | %      |                      |
| Total                                | 3,895    | (100)  | 1,139    | (100)  |                      |
| <b>Paternal characteristics</b>      |          |        |          |        |                      |
| Paternal education                   |          |        |          |        | <.001                |
| < High school                        | 289      | (7.5)  | 166      | (14.8) |                      |
| High school/GED                      | 681      | (17.7) | 308      | (27.5) |                      |
| Some college                         | 1201     | (31.2) | 352      | (31.4) |                      |
| College                              | 921      | (23.9) | 175      | (15.6) |                      |
| Graduate school                      | 764      | (19.8) | 119      | (10.6) |                      |
| <b>Maternal characteristics</b>      |          |        |          |        |                      |
| Age, years: Mean (SD)                | 30.87    | (6.0)  | 29.07    | (6.2)  | <.001                |
| Nulliparous                          | 1849     | (47.8) | 415      | (36.7) | <.001                |
| Maternal education                   |          |        |          |        | <.001                |
| < High school                        | 185      | (4.8)  | 122      | (10.7) |                      |
| High school/GED                      | 430      | (11.0) | 221      | (19.4) |                      |
| Some college                         | 1126     | (28.9) | 409      | (35.9) |                      |
| College                              | 925      | (23.7) | 177      | (15.5) |                      |
| Graduate school                      | 1229     | (31.6) | 210      | (18.4) |                      |
| Married                              | 3387     | (90.3) | 856      | (80.6) | <.001                |
| <b>Child characteristics</b>         |          |        |          |        |                      |
| Sex                                  |          |        |          |        | 0.50                 |
| Male                                 | 2031     | (52.1) | 581      | (51.0) |                      |
| Female                               | 1864     | (47.9) | 558      | (49.0) |                      |
| Race                                 |          |        |          |        | <.001                |
| Non-Hispanic white                   | 2973     | (77.0) | 715      | (64.5) |                      |
| Non-Hispanic Black                   | 97       | (2.5)  | 79       | (7.1)  |                      |
| Asian                                | 72       | (1.9)  | 11       | (1.0)  |                      |
| Hispanic                             | 210      | (5.4)  | 91       | (8.2)  |                      |
| Mixed race/other                     | 509      | (13.2) | 213      | (19.2) |                      |
| Plurality                            |          |        |          |        | <.001                |
| Singleton                            | 3083     | (79.2) | 822      | (72.2) |                      |
| Twin                                 | 786      | (20.2) | 298      | (26.2) |                      |
| Triplet                              | 26       | (0.7)  | 17       | (1.5)  |                      |
| Quadruplet                           | 0        | (0.0)  | 2        | (0.2)  |                      |
| Conceived with infertility treatment | 1251     | (32.1) | 247      | (21.7) | <.001                |

**eTable 1 (continued). Baseline characteristics between included and excluded participants (N=5,034)<sup>a</sup>**

| Sociodemographic characteristics | Included |       | Excluded |       | P-value <sup>b</sup> |
|----------------------------------|----------|-------|----------|-------|----------------------|
|                                  | N        | %     | N        | %     |                      |
| <b>Household characteristics</b> |          |       |          |       |                      |
| Townsend index: Mean (SD)        | -2.15    | (1.5) | -1.67    | (1.9) | <.001                |

<sup>a</sup>Missing data: paternal education (n=58, 1.15%); nulliparity (n=37, 0.74%); marital status (n=221, 4.39%); child race (n=64, 1.27%); Townsend index (n=285, 5.66%).

<sup>b</sup>Sociodemographic characteristics relative to inclusion status were compared using  $\chi^2$  and *t* tests.

**eTable 2. Mean and Median Screen Time by Age, for Each Trajectory Cluster (n = 1045)**

|            |     | <b>Mean minutes (SD); Median minutes (IQR)</b> |                   |                    |                    |                    |                   |                   |
|------------|-----|------------------------------------------------|-------------------|--------------------|--------------------|--------------------|-------------------|-------------------|
| Trajectory | N   | 12 Months                                      | 18 Months         | 24 Months          | 30 Months          | 36 Months          | 7 Years           | 8 Years           |
| Low        | 766 | 50.58<br>(80.55);                              | 65.87<br>(74.94); | 92.86<br>(75.68);  | 105.81<br>(74.75); | 106.87<br>(62.77); | 66.72<br>(48.54); | 72.22<br>(52.83); |
|            |     | 30.00<br>(60.00)                               | 60.00<br>(75.00)  | 60.00<br>(90.00)   | 90.00<br>(80.00)   | 120.00<br>(75.00)  | 55.71<br>(53.57)  | 60.00<br>(60.00)  |
|            |     | N = 766                                        | N = 766           | N = 766            | N = 766            | N = 766            | N = 389           | N = 405           |
|            |     |                                                |                   |                    |                    |                    |                   |                   |
| Increasing | 279 | 36.94<br>(50.25);                              | 94.81<br>(85.22); | 153.67<br>(98.98); | 181.03<br>(93.52); | 253.62<br>(88.81); | 86.88<br>(69.73); | 93.99<br>(67.90); |
|            |     | 20.00<br>(60.00)                               | 60.00<br>(90.00)  | 120.00<br>(120.00) | 165.00<br>(120.00) | 240.00<br>(120.00) | 68.57<br>(81.43)  | 85.71<br>(77.14)  |
|            |     | N =279                                         | N =279            | N = 279            | N = 279            | N = 279            | N = 119           | N = 127           |

**eTable 3. Parental, Child, and Household Characteristics of Sample by Screen Time Trajectory (n = 1045)<sup>a</sup>**

| Sociodemographic characteristics    | Low trajectory |        | Increasing trajectory |        | P-value <sup>b</sup> |
|-------------------------------------|----------------|--------|-----------------------|--------|----------------------|
|                                     | N              | %      | N                     | %      |                      |
| Total                               | 766            | (100)  | 279                   | (100)  |                      |
| <b>Paternal characteristics</b>     |                |        |                       |        |                      |
| Paternal education                  |                |        |                       |        | 0.007                |
| < High school                       | 28             | (3.7)  | 13                    | (4.7)  |                      |
| High school/GED                     | 97             | (12.8) | 42                    | (15.1) |                      |
| Some college                        | 181            | (23.8) | 92                    | (33.0) |                      |
| College                             | 246            | (32.4) | 78                    | (28.0) |                      |
| Graduate school                     | 208            | (27.4) | 54                    | (19.4) |                      |
| <b>Maternal characteristics</b>     |                |        |                       |        |                      |
| Age, years: Mean (SD)               | 32.09          | (5.3)  | 32.12                 | (5.5)  | 0.94                 |
| Nulliparous                         | 397            | (52.4) | 147                   | (53.7) | 0.72                 |
| Maternal education                  |                |        |                       |        | <.001                |
| < High school                       | 11             | (1.4)  | 4                     | (1.4)  |                      |
| High school/GED                     | 39             | (5.1)  | 29                    | (10.4) |                      |
| Some college                        | 151            | (19.7) | 76                    | (27.2) |                      |
| College                             | 222            | (29.0) | 84                    | (30.1) |                      |
| Graduate school                     | 343            | (44.8) | 86                    | (30.8) |                      |
| Moderate/severe maternal depression |                |        |                       |        |                      |
| At 1 year                           | 35             | (4.9)  | 14                    | (5.4)  | 0.77                 |
| At 2 years                          | 31             | (4.5)  | 18                    | (7.1)  | 0.12                 |
| At 3 years                          | 38             | (5.2)  | 25                    | (9.5)  | 0.01                 |
| Married                             | 715            | (95.1) | 254                   | (92.0) | 0.06                 |
| Employed                            | 558            | (73.9) | 189                   | (68.5) | 0.08                 |
| <b>Child characteristics</b>        |                |        |                       |        |                      |
| Sex                                 |                |        |                       |        | 0.05                 |
| Male                                | 385            | (50.3) | 159                   | (57.0) |                      |
| Female                              | 381            | (49.7) | 120                   | (43.0) |                      |
| Race                                |                |        |                       |        | 0.67                 |
| Non-Hispanic white                  | 639            | (83.5) | 234                   | (83.9) |                      |
| Non-Hispanic Black                  | 5              | (0.7)  | 2                     | (0.7)  |                      |
| Asian                               | 17             | (2.2)  | 8                     | (2.9)  |                      |
| Hispanic                            | 21             | (2.8)  | 11                    | (3.9)  |                      |
| Mixed race/other                    | 83             | (10.9) | 24                    | (8.6)  |                      |
| Plurality                           |                |        |                       |        | 0.95                 |
| Singleton                           | 637            | (83.2) | 230                   | (82.4) |                      |
| Twin                                | 122            | (15.9) | 46                    | (16.5) |                      |
| Triplet                             | 7              | (0.9)  | 3                     | (1.1)  |                      |

|                                      |       |        |       |        |       |
|--------------------------------------|-------|--------|-------|--------|-------|
| Conceived with infertility treatment | 311   | (40.6) | 98    | (35.1) | 0.11  |
| Care type                            |       |        |       |        |       |
| At 1 year                            |       |        |       |        | 0.28  |
| Parental care                        | 452   | (60.9) | 176   | (65.4) |       |
| Home-based care                      | 194   | (26.2) | 67    | (24.9) |       |
| Center-based care                    | 96    | (12.9) | 26    | (9.7)  |       |
| At 3 years                           |       |        |       |        | <.001 |
| Parental care                        | 417   | (56.4) | 163   | (60.4) |       |
| Home-based care                      | 165   | (22.3) | 79    | (29.3) |       |
| Center-based care                    | 157   | (21.2) | 28    | (10.4) |       |
|                                      |       |        |       |        |       |
| <b>Household characteristics</b>     |       |        |       |        |       |
| Townsend index: Mean (SD)            | -2.42 | (1.2)  | -2.27 | (1.3)  | 0.09  |
|                                      |       |        |       |        |       |
| Non-English language spoken          | 96    | (12.6) | 35    | (12.6) | 0.99  |

<sup>a</sup>Missing data: paternal education (n=6, 0.6%); nulliparity (n=13, 1.2%); maternal depression at 1 year (n=78, 7.5%), 2 years (n=109, 10.4%), and 3 years (n=51, 4.9%); marital status (n=17, 1.6%); employment (n=14, 1.3%); child race (n=1, 0.1%); care type at 1 year (n=34, 3.3%) and 3 years (n=36, 3.4%); Townsend index (n=57, 5.5%); non-English language spoken (n=6, 0.6%).

<sup>b</sup>Sociodemographic characteristics relative to screen time trajectory were compared using  $\chi^2$  and *t* tests.

**eFigure. Mean Screen Time by Age Among Complete Data (n = 398)**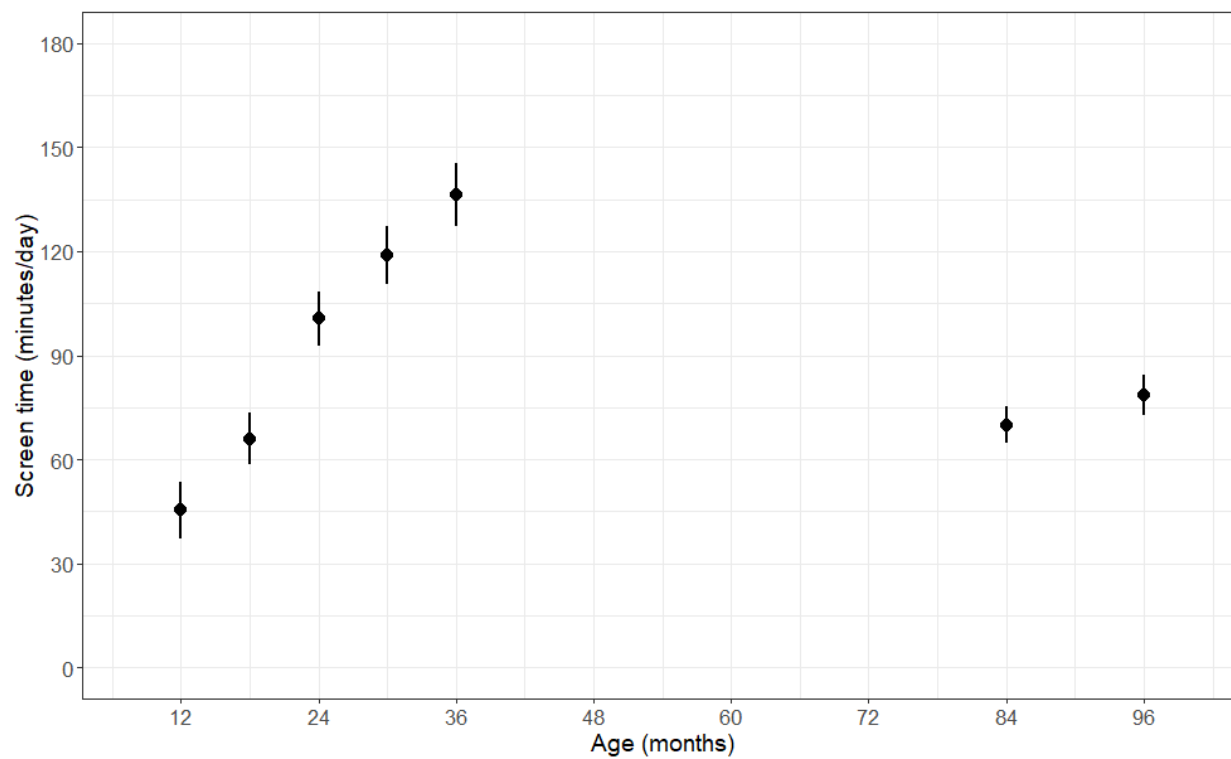

Children's mean screen time and 95% CI from 1 to 8 years of age, among those with complete screen time data for all seven timepoints
